# Supplementary material
Source: publisher figshare collection journal article supplement (https://rs.figshare.com/ndownloader/files/28924040)
Supplement: Supplementary file 1 [file 28924040]

Species	Group	Group_Size	Sex	Vocal_Rate	Feeding_Proximity	Given_Agg_DII	Received_Agg_DII	Given_Groom_DII	Received_Groom_DII	Given_Intensity	Given_Counteraggression	Received_Intensity	Received_Counteraggression
Macaca_assamensis	Assamese_Macaques	65	F	14.5	NA	0	0.25	0	0.260531136	0	0	0.076923077	0.076923077
Macaca_assamensis	Assamese_Macaques	65	F	0.51	NA	0	0.03	0.116666667	0.074074074	0.25	0	0.238095238	0.142857143
Macaca_assamensis	Assamese_Macaques	65	F	5	NA	0	0	0	0.266666667	0.2	0	0.35	0
Macaca_assamensis	Assamese_Macaques	65	F	13.58	NA	0.5	NA	0.111111111	0.2	0	0	0.333333333	0.166666667
Macaca_assamensis	Assamese_Macaques	65	F	7.38	NA	NA	0.16	NA	0.055555556	NA	NA	0.133333333	0.066666667
Macaca_assamensis	Assamese_Macaques	65	F	3.68	NA	0.25	0	0	0.28	0.153846154	0.076923077	0.333333333	0.066666667
Macaca_assamensis	Assamese_Macaques	65	F	0.46	NA	0	0.1	0	0.177777778	0.4375	0	0.142857143	0
Macaca_assamensis	Assamese_Macaques	65	F	6	NA	0.25	0.02	NA	0.097916667	0	0	0.178571429	0.035714286
Macaca_assamensis	Assamese_Macaques	65	F	12.8	NA	0.25	0	0.327777778	0.166666667	0.25	0.0625	0.285714286	0.19047619
Macaca_assamensis	Assamese_Macaques	65	M	6.92	NA	0.06	NA	0.316923077	NA	0.237288136	0.042372881	NA	NA
Macaca_assamensis	Assamese_Macaques	65	M	6.1	NA	0.02	0	0.123015873	NA	0.258333333	0.05	1	0.5
Macaca_assamensis	Assamese_Macaques	65	M	2	NA	0.05	0.07	0	NA	0	0.210526316	0.4	0
Macaca_assamensis	Assamese_Macaques	65	M	11.19	NA	0	0.33	0.380952381	0	0.115384615	0.115384615	0.4	0.4
Macaca_assamensis	Assamese_Macaques	65	M	11	NA	0.11	0.13	0.196666667	0	0.2	0.075	0.368421053	0.157894737
Macaca_assamensis	Assamese_Macaques	65	M	3.58	NA	0.08	0.35	0.200555556	NA	0.25	0.020833333	0	0.5
Macaca_assamensis	Assamese_Macaques	65	M	5.5	NA	0.25	0.1	NA	0.245833333	0.142857143	0.142857143	0.076923077	0.230769231
Macaca_assamensis	Assamese_Macaques	65	M	14.16	NA	0.12	0.11	0.125	0.055555556	0.41509434	0.037735849	0.466666667	0.066666667
Macaca_sylvanus	Barbary_Macaques_Green	20	M	0.36	NA	0.1	0.47	0.317488925	0.333333333	0	0.021352313	0	0.235294118
Macaca_sylvanus	Barbary_Macaques_Green	20	M	0.34	NA	NA	0.22	0.288888889	NA	0	0	0	0.285714286
Macaca_sylvanus	Barbary_Macaques_Green	20	M	0.17	NA	0.09	0.27	NA	NA	0	0.027522936	0	0.075757576
Macaca_sylvanus	Barbary_Macaques_Green	20	M	0.31	NA	NA	0.18	NA	0.262665945	0	0.142857143	0	0.134615385
Macaca_sylvanus	Barbary_Macaques_Green	20	M	0.37	NA	0.05	0.08	0.148575428	0.205952381	0	0	0	0.037878788
Macaca_sylvanus	Barbary_Macaques_Green	20	M	0.37	NA	0.09	0.36	NA	NA	0	0.010989011	0	0
Macaca_sylvanus	Barbary_Macaques_Green	20	M	0.44	NA	0.12	0.28	0.229264937	0	0	0.016666667	0	0.265306122
Macaca_sylvanus	Barbary_Macaques_Green	20	M	0.62	NA	0.21	0.23	0.298594455	0.28342556	0	0.086021505	0	0.016574586
Macaca_sylvanus	Barbary_Macaques_Green	20	M	0.41	NA	0.1	NA	0.359570679	NA	0	0.066496164	NA	NA
Macaca_sylvanus	Barbary_Macaques_Scarlet	29	M	0.14	NA	0.06	0.13	0.264725174	NA	0	0	NA	NA
Macaca_sylvanus	Barbary_Macaques_Scarlet	29	M	0.19	NA	0.03	0.13	0.368058608	0.25	NA	NA	NA	NA
Macaca_sylvanus	Barbary_Macaques_Scarlet	29	M	0.06	NA	0.1	0.25	0.270962371	NA	0	0.032258065	0	0
Macaca_sylvanus	Barbary_Macaques_Scarlet	29	M	0.25	NA	0.07	NA	0.378893663	NA	0	0	NA	NA
Macaca_sylvanus	Barbary_Macaques_Scarlet	29	M	0.81	NA	0	0.13	0.214285714	0.254769921	0	0	0	0.027027027
Macaca_sylvanus	Barbary_Macaques_Scarlet	29	M	0.27	NA	0.07	0.29	0.275	NA	0	0.028571429	0	0
Alouatta_pigra	Black_Howler_Monkeys_Balam	5	F	0.21	NA	NA	NA	NA	0.166666667	NA	NA	NA	NA
Alouatta_pigra	Black_Howler_Monkeys_Balam	5	F	0.24	NA	0.5	NA	0	0.375	NA	NA	NA	NA
Alouatta_pigra	Black_Howler_Monkeys_Balam	5	M	0.53	NA	NA	NA	0.1875	NA	NA	NA	NA	NA
Alouatta_pigra	Black_Howler_Monkeys_Motiepa	4	F	0.24	NA	NA	NA	NA	NA	NA	NA	NA	NA
Alouatta_pigra	Black_Howler_Monkeys_Pakal	7	F	0.26	NA	NA	NA	NA	NA	NA	NA	NA	NA
Alouatta_pigra	Black_Howler_Monkeys_Pakal	7	F	0.19	NA	NA	NA	NA	0.277777778	NA	NA	NA	NA
Alouatta_pigra	Black_Howler_Monkeys_Pakal	7	F	0.26	NA	NA	NA	0.25	NA	NA	NA	NA	NA
Alouatta_pigra	Black_Howler_Monkeys_Pakal	7	F	0.21	NA	NA	NA	NA	NA	NA	NA	NA	NA
Alouatta_pigra	Black_Howler_Monkeys_Pakal	7	M	0.29	NA	NA	0.17	NA	NA	NA	NA	0.714285714	0.714285714
Alouatta_pigra	Black_Howler_Monkeys_Pakal	7	M	0.63	NA	0.5	NA	0.25	NA	0.8	0.6	NA	NA
Alouatta_pigra	Black_Howler_Monkeys_Pakal	7	M	0.53	NA	0	NA	0.333333333	NA	0.25	0.5	NA	NA
Macaca_radiata	Bonnet_Macaques_Troop_1	25	F	2.11	NA	0	0.25	0.2	0.361111111	0	0	0.2	0
Macaca_radiata	Bonnet_Macaques_Troop_1	25	F	3.33	NA	0	NA	0.216666667	0.333333333	0.363636364	0	NA	NA
Macaca_radiata	Bonnet_Macaques_Troop_1	25	F	1.88	NA	0	NA	0.214285714	NA	0.181818182	0	NA	NA
Macaca_radiata	Bonnet_Macaques_Troop_1	25	F	0.22	NA	NA	NA	NA	0	NA	NA	NA	NA
Macaca_radiata	Bonnet_Macaques_Troop_1	25	F	1	NA	0	0	NA	0.266666667	0.4	0	0.333333333	0
Macaca_radiata	Bonnet_Macaques_Troop_1	25	F	0.25	NA	NA	0	NA	0	NA	NA	0	0
Macaca_radiata	Bonnet_Macaques_Troop_1	25	F	0	NA	0	0	0.5	0.25	0.333333333	0	0.25	0
Macaca_radiata	Bonnet_Macaques_Troop_1	25	M	1.47	NA	0	0	0	0.5	0	0	0.5	0
Macaca_radiata	Bonnet_Macaques_Troop_1	25	M	2.89	NA	0	NA	NA	NA	0.1875	0	NA	NA
Macaca_radiata	Bonnet_Macaques_Troop_1	25	M	1.68	NA	0.1	0	NA	0.333333333	0	0	0.5	0
Macaca_radiata	Bonnet_Macaques_Troop_1	25	M	3	NA	0	NA	NA	NA	0.4375	0	NA	NA
Macaca_radiata	Bonnet_Macaques_Troop_2	11	F	2.5	NA	0	NA	0.346666667	NA	0.166666667	0	NA	NA
Macaca_radiata	Bonnet_Macaques_Troop_2	11	F	0	NA	NA	NA	0	0.35	0.5	0	NA	NA
Macaca_radiata	Bonnet_Macaques_Troop_2	11	F	0	NA	0.08	NA	0.194444444	NA	0.25	0	NA	NA
Macaca_radiata	Bonnet_Macaques_Troop_2	11	F	0.44	NA	0.25	NA	0.15	0.448148148	0.333333333	0	NA	NA
Macaca_radiata	Bonnet_Macaques_Troop_2	11	F	0.44	NA	0	0.17	0	0.208333333	0.333333333	0	0	0
Macaca_radiata	Bonnet_Macaques_Troop_2	11	F	0.4	NA	0	NA	0.277777778	0.341666667	0.333333333	0	NA	NA
Macaca_radiata	Bonnet_Macaques_Troop_2	11	M	1	NA	0	NA	0.4	0.5	0.5	0	NA	NA
Macaca_radiata	Bonnet_Macaques_Troop_3	18	F	1.8	NA	0	NA	0.268465909	NA	0.083333333	0	NA	NA
Macaca_radiata	Bonnet_Macaques_Troop_3	18	F	1.3	NA	0	0.12	0	0.367368742	0.125	0	0.103448276	0
Macaca_radiata	Bonnet_Macaques_Troop_3	18	F	3.11	NA	0	0	0.125	0.289764997	0.176470588	0	0.052631579	0
Macaca_radiata	Bonnet_Macaques_Troop_3	18	F	3.36	NA	0	0	0.166666667	0.36547619	0.090909091	0	0.260869565	0
Macaca_radiata	Bonnet_Macaques_Troop_3	18	F	2.56	NA	0.03	0	0.277777778	0.248611111	0.2	0	0.125	0
Macaca_radiata	Bonnet_Macaques_Troop_3	18	F	6.95	NA	0	0	0.194289837	0.330808081	0.184615385	0	0.333333333	0
Macaca_radiata	Bonnet_Macaques_Troop_3	18	F	0.95	NA	0.17	0.22	0.192948718	0.296161616	0	0	0.5	0
Macaca_radiata	Bonnet_Macaques_Troop_3	18	M	2.83	NA	0.07	0.05	0.295093795	0.266666667	0.289473684	0	0.058823529	0
Macaca_radiata	Bonnet_Macaques_Troop_3	18	M	4.4	NA	NA	NA	NA	NA	NA	NA	NA	NA
Macaca_radiata	Bonnet_Macaques_Troop_3	18	M	1.69	NA	0.02	0	0.300925926	0.25	0.2	0	NA	NA
Pan_paniscus	Bonobos	24	F	1.2	0	NA	0	NA	0.5	NA	NA	0.166666667	NA
Pan_paniscus	Bonobos	24	F	4.68	0.15	NA	0	0.45	0.375	NA	NA	0.5	NA
Pan_paniscus	Bonobos	24	F	3.16	0.2143	0	NA	0.392857143	0.380952381	0.25	NA	0.666666667	NA
Pan_paniscus	Bonobos	24	F	3.05	0.0556	0	NA	0.388888889	0.444444444	0	NA	NA	NA
Pan_paniscus	Bonobos	24	F	3.09	0.0476	NA	0	NA	0.392857143	NA	NA	0.315789474	NA
Pan_paniscus	Bonobos	24	F	3.4	0.1154	0	0	0.375	0.5	0.181818182	NA	0.333333333	NA
Pan_paniscus	Bonobos	24	F	2.82	0.2727	0.1	0.333333333	0.5	0.444444444	0.294117647	NA	NA	NA
Pan_paniscus	Bonobos	24	F	2.53	0.2963	NA	0.25	0.277777778	0	0.4	NA	0.333333333	NA
Pan_paniscus	Bonobos	24	F	3.43	0.0822	NA	0	NA	NA	NA	NA	0.125	NA
Pan_paniscus	Bonobos	24	F	2.94	0.1321	NA	0	0.5	0.475	NA	NA	0.2	NA
Pan_paniscus	Bonobos	24	F	3	0	NA	NA	NA	0.446666667	NA	NA	1	NA
Pan_paniscus	Bonobos	24	F	4.1	0.0588	0	0	0.402777778	0.5	0.2	NA	0.5	NA
Pan_paniscus	Bonobos	24	M	4.25	0	0	0	0.5	NA	0	NA	0.055555556	NA
Pan_paniscus	Bonobos	24	M	5.78	0.0526	0.047619048	0	0.416666667	0.454545455	0.029411765	NA	0	NA
Pan_paniscus	Bonobos	24	M	3.52	0.125	0.025	NA	0.39033189	NA	0.061728395	NA	NA	NA
Pan_paniscus	Bonobos	24	M	9.26	0.0435	NA	0.166666667	NA	NA	0.5	NA	0	NA
Pan_paniscus	Bonobos	24	M	4.75	0	0	0	0.466666667	0.333333333	0.15	NA	0	NA
Pan_paniscus	Bonobos	24	M	3.33	0	NA	0	NA	0.333333333	NA	NA	0.035714286	NA
Pan_paniscus	Bonobos	24	M	4.31	0.0377	NA	0	NA	0.4375	NA	NA	0.1	NA
Pan_troglodytes_schweinfurthii	Chimpanzees_Kanyawara	38	F	4.726361422	NA	0	0.5	0.25	0.345	0.4	0	0.333333333	0
Pan_troglodytes_schweinfurthii	Chimpanzees_Kanyawara	38	F	5.522104311	NA	0	0	0	0.278409091	0.5	0	0.25	0
Pan_troglodytes_schweinfurthii	Chimpanzees_Kanyawara	38	F	2.986783483	0.181818182	0	0	0.40625	0.275	0.5	0	0.366666667	0.033333333
Pan_troglodytes_schweinfurthii	Chimpanzees_Kanyawara	38	F	1.797865848	0.083333333	0	0.05	0.142857143	0.323565324	0.666666667	0	0.5	0.1
Pan_troglodytes_schweinfurthii	Chimpanzees_Kanyawara	38	F	2.135108175	NA	0	0	0	0.485294118	1	0	0.5	0
Pan_troglodytes_schweinfurthii	Chimpanzees_Kanyawara	38	F	4.680696839	NA	0.5	0	0.470588235	0.247685185	0.8	0	0.6	0
Pan_troglodytes_schweinfurthii	Chimpanzees_Kanyawara	38	F	13.04088628	0.166666667	0.25	0	0.5	0.292215523	0.666666667	0	0.25	0
Pan_troglodytes_schweinfurthii	Chimpanzees_Kanyawara	38	F	1.635304936	0.294117647	0	0	0.430555556	0.365538194	0.125	0	0.363636364	0.090909091
Pan_troglodytes_schweinfurthii	Chimpanzees_Kanyawara	38	F	0.886675484	NA	0	0	0.5	0.458465608	0.5	0	0.636363636	0
Pan_troglodytes_schweinfurthii	Chimpanzees_Kanyawara	38	F	3.078336331	NA	NA	0	0.454545455	0.036363636	NA	NA	0.5	0.038461538
Pan_troglodytes_schweinfurthii	Chimpanzees_Kanyawara	38	F	4.052235484	NA	NA	0.05	NA	0.293081918	NA	NA	0.555555556	0.066666667
Pan_troglodytes_schweinfurthii	Chimpanzees_Kanyawara	38	F	8.782819456	NA	0	0.07	0	0.29174397	0.4	0	0.21875	0.0625
Pan_troglodytes_schweinfurthii	Chimpanzees_Kanyawara	38	M	2.383256827	NA	0	0	0.1875	0.298333333	0.444444444	0.055555556	0.333333333	0.333333333
Pan_troglodytes_schweinfurthii	Chimpanzees_Kanyawara	38	M	7.824395768	0.230769231	0	0.17	0.254540275	0.172348485	0.333333333	0.058823529	0.083333333	0
Pan_troglodytes_schweinfurthii	Chimpanzees_Kanyawara	38	M	1.66353086	NA	0	0	NA	0.205555556	0.666666667	0	0.5625	0
Pan_troglodytes_schweinfurthii	Chimpanzees_Kanyawara	38	M	5.401806229	NA	0	0	0.22331488	0.259126984	0.416666667	0	NA	NA
Pan_troglodytes_schweinfurthii	Chimpanzees_Kanyawara	38	M	9.204904588	NA	NA	0.07	NA	0.212173649	NA	NA	0.37037037	0.037037037
Pan_troglodytes_schweinfurthii	Chimpanzees_Kanyawara	38	M	5.593653401	NA	0.04	NA	0.252114321	NA	0.280898876	0.02247191	NA	NA
Pan_troglodytes_schweinfurthii	Chimpanzees_Kanyawara	38	M	2.827695672	NA	0.06	NA	0.312284123	0.21875	0.397590361	0.012048193	NA	NA
Pan_troglodytes_schweinfurthii	Chimpanzees_Kanyawara	38	M	3.164030598	NA	0.19	0.03	0.279658052	0.245299145	0.5	0.125	0.153846154	0.025641026
Pan_troglodytes_schweinfurthii	Chimpanzees_Kanyawara	38	M	4.878687814	NA	0.01	0.13	0.346673292	0.412962963	0.323943662	0.028169014	0.173913043	0.086956522
Pan_troglodytes_schweinfurthii	Chimpanzees_Kanyawara	38	M	1.815798506	NA	0	0.5	0.311126984	0.421474359	0.2	0.085714286	0	0
Pan_troglodytes_schweinfurthii	Chimpanzees_Kanyawara	38	M	3.517229251	0.3	0.01	0	0.376116071	0.375	0.348837209	0.046511628	0.388888889	0
Pan_troglodytes_schweinfurthii	Chimpanzees_Kanyawara	38	M	2.600057057	NA	0.5	0	NA	0.318181818	NA	NA	0.384615385	0
Pan_troglodytes_schweinfurthii	Chimpanzees_Kanyawara	38	M	7.351035905	0	0	0	0.341666667	0.334590348	0.833333333	0	0.214285714	0
Pan_troglodytes_schweinfurthii	Chimpanzees_Mayebe	43	M	1.49	NA	NA	NA	NA	NA	NA	NA	NA	NA
Pan_troglodytes_schweinfurthii	Chimpanzees_Mayebe	43	M	1.42	NA	0	NA	0.166666667	NA	0.125	0	NA	NA
Pan_troglodytes_schweinfurthii	Chimpanzees_Mayebe	43	M	2.19	NA	NA	NA	NA	0.25	0	0	NA	NA
Pan_troglodytes_schweinfurthii	Chimpanzees_Mayebe	43	M	1.83	NA	NA	NA	NA	NA	0	0	NA	NA
Pan_troglodytes_schweinfurthii	Chimpanzees_Mayebe	43	M	2.18	NA	NA	0	NA	0.333333333	NA	NA	0	0
Pan_troglodytes_schweinfurthii	Chimpanzees_Mayebe	43	M	0.44	NA	NA	NA	NA	NA	NA	NA	NA	NA
Pan_troglodytes_schweinfurthii	Chimpanzees_Mayebe	43	M	1.1	NA	0	NA	0.392857143	NA	0	0	NA	NA
Macaca_nigra	Crested_Macaques_PB	43	F	5.99	0.5093	0	0	0.083333333	0.222222222	0.333333333	0	0.136363636	0
Macaca_nigra	Crested_Macaques_PB	43	F	3.94	0.413	0	0	0.166666667	0.25	NA	NA	0.076923077	0
Macaca_nigra	Crested_Macaques_PB	43	F	5.4	0.1412	0	0	0.297619048	0.464285714	0.1	0	0	0
Macaca_nigra	Crested_Macaques_PB	43	F	10.72	0.0426	0	0	0.125	0.166666667	0.090909091	0	0	0
Macaca_nigra	Crested_Macaques_PB	43	F	12.22	0.2378	NA	0	NA	0.5	NA	NA	0.3	0
Macaca_nigra	Crested_Macaques_PB	43	M	9.37	0.0952	0.02	NA	0.266666667	NA	0.068181818	0.045454545	NA	NA
Macaca_nigra	Crested_Macaques_PB	43	M	5.86	0.0189	0.03	0	0	0	0	0	NA	NA
Macaca_nigra	Crested_Macaques_PB	43	M	5.67	0.0813	0	NA	0.446666667	NA	0	0	0	0
Macaca_nigra	Crested_Macaques_PB	43	M	4.45	0.0526	NA	0	0	0.208333333	0	0	0	0
Macaca_nigra	Crested_Macaques_PB	43	M	3.79	0.0827	0.04	0.17	0.31547619	0.4	0.048780488	0.024390244	0	0.166666667
Macaca_nigra	Crested_Macaques_R1	65	F	7.51	0.1286	NA	0.07	NA	0.173958333	NA	NA	0.019607843	0
Macaca_nigra	Crested_Macaques_R1	65	F	5	0.1167	0.02	NA	0.346969697	NA	0	0	NA	NA
Macaca_nigra	Crested_Macaques_R1	65	F	10.89	0.0647	0	0	0.208333333	0.259259259	0.125	0	0	0
Macaca_nigra	Crested_Macaques_R1	65	F	6.29	0.101	0.17	0	0.266666667	0.333333333	0.25	0	0.166666667	0.041666667
Macaca_nigra	Crested_Macaques_R1	65	F	7.24	0.0839	0	0	0	0.395238095	0	0	0.105263158	0.052631579
Macaca_nigra	Crested_Macaques_R1	65	M	9.41	0.0789	0.08	0.02	0.361734694	0.5	0.075471698	0.018867925	0.058823529	0.058823529
Macaca_nigra	Crested_Macaques_R1	65	M	6.28	0.0795	0.03	0.1	0.25	NA	0.023255814	0	0.05	0
Macaca_nigra	Crested_Macaques_R1	65	M	9.37	0.0559	0.08	0	0.23	NA	0.046153846	0.015384615	NA	NA
Macaca_nigra	Crested_Macaques_R1	65	M	1.88	0.0461	0.06	0.05	0.204166667	0.5	0.047619048	0	0.066666667	0
Theropithecus_gelada	Geladas_A	8.455555556	F	6.07	0.2549	NA	NA	NA	NA	NA	NA	NA	NA
Theropithecus_gelada	Geladas_A	8.455555556	F	8	0.1613	NA	NA	NA	NA	NA	NA	NA	NA
Theropithecus_gelada	Geladas_A	8.455555556	F	7.08	0.371	NA	NA	NA	NA	NA	NA	NA	NA
Theropithecus_gelada	Geladas_A	8.455555556	F	2	0.2632	NA	NA	NA	NA	NA	NA	NA	NA
Theropithecus_gelada	Geladas_A	8.455555556	M	13.88	0.3158	NA	NA	NA	NA	NA	NA	NA	NA
Theropithecus_gelada	Geladas_B	12.76111111	F	18.5	0.2	NA	NA	NA	NA	0	0.5	NA	NA
Theropithecus_gelada	Geladas_B	12.76111111	F	25.5	0.1429	0.5	NA	0.333333333	0.454545455	NA	NA	0	0.5
Theropithecus_gelada	Geladas_B	12.76111111	F	18.22	0.0909	NA	NA	NA	NA	NA	NA	0	0
Theropithecus_gelada	Geladas_B1	21.08888889	F	7.5	0.2381	NA	NA	0.229166667	0.25	NA	NA	NA	NA
Theropithecus_gelada	Geladas_B1	21.08888889	F	5.57	0.2941	NA	NA	0.276190476	0.25	1	0	NA	NA
Theropithecus_gelada	Geladas_B1	21.08888889	F	8	0.2778	NA	0.5	NA	NA	NA	NA	NA	NA
Theropithecus_gelada	Geladas_B1	21.08888889	F	5.29	0.2407	NA	NA	NA	NA	NA	NA	NA	NA
Theropithecus_gelada	Geladas_B1	21.08888889	F	5.76	0.3585	NA	0	NA	0.405357143	NA	NA	0.6	0
Theropithecus_gelada	Geladas_B1	21.08888889	F	6.96	0.2778	NA	NA	0.353409091	0.452380952	NA	NA	NA	NA
Theropithecus_gelada	Geladas_B1	21.08888889	F	7.43	0.1429	NA	NA	0.5	0.242857143	NA	NA	NA	NA
Theropithecus_gelada	Geladas_B1	21.08888889	F	5.67	0.2051	NA	NA	NA	NA	NA	NA	NA	NA
Theropithecus_gelada	Geladas_B1	21.08888889	M	8.65	0.2105	0.11	NA	0.311255411	0.333333333	0.142857143	0	NA	NA
Theropithecus_gelada	Geladas_B1	21.08888889	M	8.25	0.3143	0	0	0.45	0	0	0	0	0
Theropithecus_gelada	Geladas_B1	21.08888889	M	10.12	0.3793	0	0.33	0.361111111	0.239583333	0	0.5	NA	NA
Theropithecus_gelada	Geladas_B1	21.08888889	M	6.8	0.0526	NA	0	NA	0.166666667	NA	NA	0	0.125
Theropithecus_gelada	Geladas_B2	4.627777778	F	7.08	0.15	NA	NA	NA	NA	NA	NA	NA	NA
Theropithecus_gelada	Geladas_B2	4.627777778	F	9.23	0.3043	NA	NA	NA	NA	NA	NA	NA	NA
Theropithecus_gelada	Geladas_B2	4.627777778	F	4.8	0.32	NA	NA	NA	NA	NA	NA	NA	NA
Theropithecus_gelada	Geladas_B2	4.627777778	M	11.25	NA	NA	NA	NA	NA	NA	NA	NA	NA
Theropithecus_gelada	Geladas_B3	10	F	11.56	NA	NA	NA	0.229166667	0.25	NA	NA	NA	NA
Theropithecus_gelada	Geladas_B3	10	F	11.27	NA	0	NA	0.385714286	NA	NA	NA	NA	NA
Theropithecus_gelada	Geladas_B3	10	F	11.64	NA	NA	0	NA	0.405357143	NA	NA	NA	NA
Theropithecus_gelada	Geladas_B3	10	F	8.44	NA	NA	NA	NA	0.464285714	NA	NA	NA	NA
Theropithecus_gelada	Geladas_B3	10	M	15.56	NA	NA	NA	NA	NA	NA	NA	NA	NA
Theropithecus_gelada	Geladas_C1	9.238888889	F	4.38	0.3902	NA	0	0.290634384	0	NA	NA	0	0
Theropithecus_gelada	Geladas_C1	9.238888889	F	2.4	NA	0	NA	0.277777778	0.353281853	NA	NA	0	0
Theropithecus_gelada	Geladas_C1	9.238888889	F	4.48	0.2131	0.17	NA	0.328042328	NA	0	0	NA	NA
Theropithecus_gelada	Geladas_C1	9.238888889	F	7.07	0.2115	NA	0.17	NA	0.290987224	NA	NA	0.125	0
Theropithecus_gelada	Geladas_C1	9.238888889	F	5.33	0.3182	0.25	0.39	0.39047619	0.229166667	0.25	0	NA	NA
Theropithecus_gelada	Geladas_C1	9.238888889	F	4.1	NA	0.25	0.5	0.333333333	0.221428571	0	0	0	0
Theropithecus_gelada	Geladas_C1	9.238888889	F	4.86	0.2911	0.25	NA	0.211740042	0	0	0	NA	NA
Theropithecus_gelada	Geladas_C1	9.238888889	F	3.65	0.3333	NA	0.11	0.166666667	0.442610063	NA	NA	NA	NA
Theropithecus_gelada	Geladas_C1	9.238888889	M	18.86	0.36	NA	0	0.428571429	0.238690476	NA	NA	NA	NA
Theropithecus_gelada	Geladas_C1	9.238888889	M	9.48	0.3462	NA	0.17	0.304878049	0.452380952	NA	NA	0	0
Theropithecus_gelada	Geladas_C2	2.836111111	F	8.89	NA	NA	NA	NA	NA	NA	NA	NA	NA
Theropithecus_gelada	Geladas_C2	2.836111111	F	11.83	0.0667	NA	NA	NA	NA	NA	NA	NA	NA
Theropithecus_gelada	Geladas_C2	2.836111111	M	12.36	0.2105	NA	NA	NA	NA	NA	NA	NA	NA
Theropithecus_gelada	Geladas_C3	5.283333333	F	10.86	0.1316	NA	NA	0.41384778	0.481481481	NA	NA	NA	NA
Theropithecus_gelada	Geladas_C3	5.283333333	F	12.95	NA	NA	NA	NA	0.443580542	NA	NA	0	0
Theropithecus_gelada	Geladas_C3	5.283333333	M	13.2	0.0645	NA	0	0.5	0.445736434	NA	NA	0	0.166666667
Theropithecus_gelada	Geladas_C3	5.283333333	M	15.14	0.175	0	NA	0.466861598	NA	0	0.125	NA	NA
Theropithecus_gelada	Geladas_C4	8.482857143	F	12.25	0.0323	0	NA	0.277777778	0.353281853	NA	NA	NA	NA
Theropithecus_gelada	Geladas_C4	8.482857143	F	15.11	0.1053	NA	0.17	NA	0.290987224	NA	NA	NA	NA
Theropithecus_gelada	Geladas_C4	8.482857143	F	13.76	0.1077	0.25	0.39	0.39047619	0.229166667	NA	NA	NA	NA
Theropithecus_gelada	Geladas_C4	8.482857143	F	18.51	0.1509	0.25	0.5	0.333333333	0.221428571	NA	NA	NA	NA
Theropithecus_gelada	Geladas_C4	8.482857143	M	22	NA	NA	NA	NA	NA	NA	NA	NA	NA
Theropithecus_gelada	Geladas_C5	14.78611111	F	12.16	NA	0	NA	0.277777778	0.353281853	NA	NA	NA	NA
Theropithecus_gelada	Geladas_C5	14.78611111	F	14.81	NA	0.17	NA	0.328042328	NA	0	0	NA	NA
Theropithecus_gelada	Geladas_C5	14.78611111	F	14.87	NA	0.25	0.39	0.39047619	0.229166667	NA	NA	0	0
Theropithecus_gelada	Geladas_C5	14.78611111	F	15.86	NA	0.25	0.5	0.333333333	0.221428571	NA	NA	NA	NA
Theropithecus_gelada	Geladas_C5	14.78611111	F	12.96	NA	NA	0.11	0.166666667	0.442610063	NA	NA	0.5	0
Theropithecus_gelada	Geladas_C5	14.78611111	M	13.69	NA	0	0	0.358704453	0.448737374	0.5	0	NA	NA
Theropithecus_gelada	Geladas_D	15.53611111	F	12.89	NA	NA	NA	NA	0.429249763	NA	NA	NA	NA
Theropithecus_gelada	Geladas_D	15.53611111	F	16.64	NA	NA	NA	NA	0.325193325	NA	NA	NA	NA
Theropithecus_gelada	Geladas_D	15.53611111	F	13.16	NA	NA	NA	0.489110708	0.334123847	NA	NA	NA	NA
Theropithecus_gelada	Geladas_D	15.53611111	F	12	NA	NA	NA	0.407277907	0.5	NA	NA	NA	NA
Theropithecus_gelada	Geladas_D	15.53611111	M	19.67	NA	0.25	NA	0.313611641	NA	0	0	NA	NA
Theropithecus_gelada	Geladas_D	15.53611111	M	14.85	NA	NA	0.5	0.409090909	0.474856322	NA	NA	NA	NA
Theropithecus_gelada	Geladas_D	15.53611111	M	15.04	NA	NA	0	NA	0.5	NA	NA	0	0
Theropithecus_gelada	Geladas_F_old	6.231454006	F	13.87	0.0833	NA	NA	NA	NA	NA	NA	NA	NA
Theropithecus_gelada	Geladas_F_old	6.231454006	F	11.56	0.08	NA	NA	NA	NA	NA	NA	NA	NA
Theropithecus_gelada	Geladas_F_old	6.231454006	F	18.86	0.2	NA	NA	NA	NA	NA	NA	NA	NA
Theropithecus_gelada	Geladas_F_old	6.231454006	F	19	0.1724	NA	NA	NA	NA	NA	NA	NA	NA
Theropithecus_gelada	Geladas_F_old	6.231454006	M	19.33	NA	NA	NA	NA	NA	NA	NA	NA	NA
Theropithecus_gelada	Geladas_G	13.61944444	F	4.44	NA	NA	NA	NA	NA	NA	NA	NA	NA
Theropithecus_gelada	Geladas_G	13.61944444	F	2.67	NA	NA	NA	NA	NA	NA	NA	NA	NA
Theropithecus_gelada	Geladas_G	13.61944444	F	6.6	NA	NA	NA	NA	NA	NA	NA	NA	NA
Theropithecus_gelada	Geladas_G	13.61944444	F	6.35	NA	NA	NA	NA	NA	NA	NA	NA	NA
Theropithecus_gelada	Geladas_G	13.61944444	F	5.33	NA	NA	NA	NA	NA	NA	NA	NA	NA
Theropithecus_gelada	Geladas_G	13.61944444	M	12.44	NA	NA	NA	NA	NA	NA	NA	NA	NA
Theropithecus_gelada	Geladas_H1	7.577777778	F	8.8	0.2105	NA	NA	NA	NA	NA	NA	NA	NA
Theropithecus_gelada	Geladas_H1	7.577777778	F	8.8	0.0476	NA	NA	NA	NA	NA	NA	NA	NA
Theropithecus_gelada	Geladas_H1	7.577777778	F	5.45	0.1333	NA	NA	NA	NA	NA	NA	NA	NA
Theropithecus_gelada	Geladas_H1	7.577777778	F	6.67	0.2	NA	NA	NA	NA	NA	NA	NA	NA
Theropithecus_gelada	Geladas_H1	7.577777778	F	8.33	0.0476	NA	NA	NA	NA	NA	NA	NA	NA
Theropithecus_gelada	Geladas_H1	7.577777778	F	6.91	0.15	NA	NA	NA	NA	NA	NA	NA	NA
Theropithecus_gelada	Geladas_H1	7.577777778	F	7.27	0.0909	NA	NA	NA	NA	NA	NA	NA	NA
Theropithecus_gelada	Geladas_H1	7.577777778	M	11.33	NA	NA	NA	NA	NA	NA	NA	NA	NA
Theropithecus_gelada	Geladas_H2	3.141666667	F	7.43	0.25	NA	NA	NA	NA	NA	NA	NA	NA
Theropithecus_gelada	Geladas_H2	3.141666667	F	7.14	0.2222	NA	NA	NA	NA	NA	NA	NA	NA
Theropithecus_gelada	Geladas_H2	3.141666667	M	14.57	NA	NA	NA	NA	NA	NA	NA	NA	NA
Theropithecus_gelada	Geladas_J	5.718045113	F	10.79	0.0938	NA	NA	NA	NA	NA	NA	NA	NA
Theropithecus_gelada	Geladas_J	5.718045113	F	11.5	0.1707	NA	NA	NA	NA	NA	NA	NA	NA
Theropithecus_gelada	Geladas_J	5.718045113	M	15.47	0.2698	NA	NA	NA	NA	NA	NA	NA	NA
Theropithecus_gelada	Geladas_J	5.718045113	M	13.5	0.2329	NA	NA	NA	NA	NA	NA	NA	NA
Theropithecus_gelada	Geladas_J1	7.297222222	F	11.92	NA	NA	NA	NA	NA	NA	NA	NA	NA
Theropithecus_gelada	Geladas_J1	7.297222222	F	9.33	NA	NA	NA	NA	NA	NA	NA	NA	NA
Theropithecus_gelada	Geladas_J1	7.297222222	M	14.37	NA	NA	NA	NA	NA	NA	NA	NA	NA
Theropithecus_gelada	Geladas_J1	7.297222222	M	12.9	NA	NA	NA	NA	NA	NA	NA	NA	NA
Theropithecus_gelada	Geladas_J1	7.297222222	M	9.88	NA	NA	NA	NA	NA	NA	NA	NA	NA
Theropithecus_gelada	Geladas_K	5	F	9.93	NA	NA	NA	NA	NA	NA	NA	NA	NA
Theropithecus_gelada	Geladas_K	5	F	9.9	NA	NA	NA	NA	NA	NA	NA	NA	NA
Theropithecus_gelada	Geladas_K	5	M	9.89	NA	NA	NA	NA	NA	NA	NA	NA	NA
Theropithecus_gelada	Geladas_L	7.722222222	F	2.8	0.2	NA	NA	NA	NA	NA	NA	NA	NA
Theropithecus_gelada	Geladas_L	7.722222222	F	4	0.3571	NA	NA	NA	NA	NA	NA	NA	NA
Theropithecus_gelada	Geladas_L	7.722222222	F	4	0.1875	NA	NA	NA	NA	NA	NA	NA	NA
Theropithecus_gelada	Geladas_L	7.722222222	F	9.33	0.2353	NA	NA	NA	NA	NA	NA	NA	NA
Theropithecus_gelada	Geladas_L	7.722222222	F	4.44	0.2353	NA	NA	NA	NA	NA	NA	NA	NA
Theropithecus_gelada	Geladas_L	7.722222222	M	10.4	NA	NA	NA	NA	NA	NA	NA	NA	NA
Theropithecus_gelada	Geladas_M	10.3767313	F	7.73	0.0909	NA	NA	NA	NA	NA	NA	0	0
Theropithecus_gelada	Geladas_M	10.3767313	F	10.15	0.6111	NA	NA	0.428571429	0.490196078	NA	NA	NA	NA
Theropithecus_gelada	Geladas_M	10.3767313	F	7.14	0.2667	NA	NA	0.444444444	NA	NA	NA	NA	NA
Theropithecus_gelada	Geladas_M	10.3767313	F	8.31	0.1786	NA	NA	NA	NA	NA	NA	NA	NA
Theropithecus_gelada	Geladas_M	10.3767313	F	5.23	0.2143	NA	0.5	NA	0.43566992	NA	NA	0	0
Theropithecus_gelada	Geladas_M	10.3767313	F	5.14	NA	NA	NA	NA	0.380952381	0	0	NA	NA
Theropithecus_gelada	Geladas_M	10.3767313	F	6.29	0.4118	0.5	NA	NA	NA	NA	NA	NA	NA
Theropithecus_gelada	Geladas_M	10.3767313	F	7.08	0.1786	NA	NA	0.428571429	0.482142857	NA	NA	NA	NA
Theropithecus_gelada	Geladas_M	10.3767313	F	8	0.25	NA	NA	NA	NA	0.5	0	NA	NA
Theropithecus_gelada	Geladas_M	10.3767313	M	11.2	0.4737	NA	0	0.393518519	0.277777778	0	0	0.333333333	0
Theropithecus_gelada	Geladas_M	10.3767313	M	13	0.25	0	NA	0.354347826	0.454545455	0.333333333	0	NA	NA
Theropithecus_gelada	Geladas_M1	13.74444444	F	13.76	NA	NA	NA	0.428571429	0.490196078	NA	NA	NA	NA
Theropithecus_gelada	Geladas_M1	13.74444444	F	11.53	NA	NA	NA	0.444444444	NA	0	0	NA	NA
Theropithecus_gelada	Geladas_M1	13.74444444	F	11.45	NA	NA	0.5	NA	0.43566992	NA	NA	NA	NA
Theropithecus_gelada	Geladas_M1	13.74444444	F	10.3	NA	NA	NA	0.492063492	0.333333333	NA	NA	NA	NA
Theropithecus_gelada	Geladas_M1	13.74444444	F	11.43	NA	NA	NA	NA	0.380952381	NA	NA	NA	NA
Theropithecus_gelada	Geladas_M1	13.74444444	F	9.21	NA	NA	NA	0.428571429	0.482142857	NA	NA	NA	NA
Theropithecus_gelada	Geladas_M1	13.74444444	F	9.2	NA	NA	NA	0.437198068	0.428571429	NA	NA	NA	NA
Theropithecus_gelada	Geladas_M1	13.74444444	M	14.55	NA	NA	NA	0.438698556	0.5	NA	NA	NA	NA
Theropithecus_gelada	Geladas_M2	10.65555556	F	14.46	NA	NA	NA	NA	NA	NA	NA	NA	NA
Theropithecus_gelada	Geladas_M2	10.65555556	F	14.05	NA	NA	NA	NA	NA	NA	NA	NA	NA
Theropithecus_gelada	Geladas_M2	10.65555556	F	11.14	NA	NA	NA	NA	NA	NA	NA	NA	NA
Theropithecus_gelada	Geladas_M2	10.65555556	F	10.22	NA	0.5	NA	NA	NA	NA	NA	NA	NA
Theropithecus_gelada	Geladas_M2	10.65555556	M	15.49	NA	NA	NA	NA	NA	NA	NA	NA	NA
Theropithecus_gelada	Geladas_M3	NA	F	16	0.2206	NA	NA	NA	NA	NA	NA	NA	NA
Theropithecus_gelada	Geladas_M3	NA	F	26	0.1818	NA	NA	NA	NA	NA	NA	NA	NA
Theropithecus_gelada	Geladas_M3	NA	F	21.33	0.2881	NA	NA	0.428571429	0.490196078	NA	NA	NA	NA
Theropithecus_gelada	Geladas_M3	NA	F	21.45	0.1795	NA	NA	0.444444444	NA	NA	NA	NA	NA
Theropithecus_gelada	Geladas_M3	NA	F	21.33	0.2676	NA	NA	NA	NA	NA	NA	NA	NA
Theropithecus_gelada	Geladas_M3	NA	F	22.5	0.1803	NA	0.5	NA	0.43566992	NA	NA	NA	NA
Theropithecus_gelada	Geladas_M3	NA	F	31.64	0.1852	0.5	NA	NA	NA	NA	NA	NA	NA
Theropithecus_gelada	Geladas_M3	NA	M	23.38	0.2174	NA	NA	NA	NA	NA	NA	NA	NA
Theropithecus_gelada	Geladas_N	8.827777778	F	8	0.3333	NA	NA	NA	NA	NA	NA	NA	NA
Theropithecus_gelada	Geladas_N	8.827777778	F	8.96	0.0909	NA	NA	NA	NA	NA	NA	NA	NA
Theropithecus_gelada	Geladas_N	8.827777778	F	7.86	0.1053	NA	NA	NA	NA	NA	NA	NA	NA
Theropithecus_gelada	Geladas_N	8.827777778	F	9.47	0.1852	NA	NA	NA	NA	NA	NA	NA	NA
Theropithecus_gelada	Geladas_N	8.827777778	M	16.97	0.2222	NA	NA	NA	NA	NA	NA	NA	NA
Theropithecus_gelada	Geladas_N	8.827777778	M	8.15	NA	NA	NA	NA	NA	NA	NA	NA	NA
Theropithecus_gelada	Geladas_O	11.96258503	F	6.22	0.1667	NA	0	0.444444444	0.428571429	NA	NA	0.75	0
Theropithecus_gelada	Geladas_O	11.96258503	F	7.11	0.0833	NA	NA	0.45	NA	NA	NA	NA	NA
Theropithecus_gelada	Geladas_O	11.96258503	F	5.18	0.3636	NA	0	0.4375	0.395833333	NA	NA	0.5	0
Theropithecus_gelada	Geladas_O	11.96258503	M	14.24	0.1944	0	NA	0.339285714	0.5	0.272727273	0	NA	NA
Theropithecus_gelada	Geladas_O	11.96258503	M	16.64	NA	NA	0	NA	0.40625	NA	NA	0	0
Theropithecus_gelada	Geladas_Q	7.469444444	F	11.38	0.1538	NA	0.5	NA	NA	NA	NA	NA	NA
Theropithecus_gelada	Geladas_Q	7.469444444	F	5.23	0.2	NA	NA	NA	NA	NA	NA	NA	NA
Theropithecus_gelada	Geladas_Q	7.469444444	M	14.86	0.2778	NA	NA	NA	NA	NA	NA	NA	NA
Theropithecus_gelada	Geladas_R	8.283333333	F	11.5	0.4167	NA	NA	NA	NA	NA	NA	NA	NA
Theropithecus_gelada	Geladas_R	8.283333333	F	2.46	0.2182	NA	NA	NA	NA	NA	NA	NA	NA
Theropithecus_gelada	Geladas_R	8.283333333	F	11.56	0.3636	NA	NA	NA	NA	NA	NA	NA	NA
Theropithecus_gelada	Geladas_R	8.283333333	F	8	0.3333	NA	NA	NA	NA	NA	NA	NA	NA
Theropithecus_gelada	Geladas_R	8.283333333	F	4.5	0.3469	NA	NA	NA	NA	NA	NA	NA	NA
Theropithecus_gelada	Geladas_R	8.283333333	F	5.33	0.1818	NA	NA	NA	NA	NA	NA	NA	NA
Theropithecus_gelada	Geladas_R	8.283333333	M	7.11	0.1667	NA	NA	NA	NA	NA	NA	NA	NA
Theropithecus_gelada	Geladas_S	8.775	F	4	0.2143	NA	NA	NA	NA	NA	NA	NA	NA
Theropithecus_gelada	Geladas_S	8.775	F	6.8	0.2727	NA	NA	NA	NA	NA	NA	NA	NA
Theropithecus_gelada	Geladas_S	8.775	F	2.67	0.0769	NA	NA	NA	NA	NA	NA	NA	NA
Theropithecus_gelada	Geladas_S	8.775	F	5.5	0.2308	NA	NA	NA	NA	NA	NA	NA	NA
Theropithecus_gelada	Geladas_S	8.775	F	4.8	0.0882	NA	NA	NA	NA	NA	NA	NA	NA
Theropithecus_gelada	Geladas_S	8.775	M	14.22	0.3462	NA	NA	NA	NA	NA	NA	NA	NA
Theropithecus_gelada	Geladas_S	8.775	M	13.78	0.25	NA	NA	NA	NA	NA	NA	NA	NA
Theropithecus_gelada	Geladas_T	18.37950139	F	7.62	0.1837	NA	NA	0.333333333	0.15	NA	NA	NA	NA
Theropithecus_gelada	Geladas_T	18.37950139	F	6.48	0.1132	NA	NA	NA	0.388888889	NA	NA	0.5	0
Theropithecus_gelada	Geladas_T	18.37950139	F	7.62	0.4043	NA	0.5	0.4125	0.125	NA	NA	NA	NA
Theropithecus_gelada	Geladas_T	18.37950139	F	8.57	0.2766	NA	0.5	0.277777778	0.428571429	NA	NA	NA	NA
Theropithecus_gelada	Geladas_T	18.37950139	F	4.5	0.4737	NA	NA	NA	NA	NA	NA	NA	NA
Theropithecus_gelada	Geladas_T	18.37950139	F	5.2	0.25	0.5	NA	0.208333333	0.25	NA	NA	NA	NA
Theropithecus_gelada	Geladas_T	18.37950139	F	8.36	0.0784	NA	NA	0.083333333	0.388888889	NA	NA	NA	NA
Theropithecus_gelada	Geladas_T	18.37950139	F	10.95	0.1622	NA	NA	0.5	0.246666667	NA	NA	NA	NA
Theropithecus_gelada	Geladas_T	18.37950139	F	8	0.1875	NA	NA	0.2	0	NA	NA	NA	NA
Theropithecus_gelada	Geladas_T	18.37950139	M	13.38	0.4211	0.5	NA	0.275510204	NA	0.6	0	NA	NA
Theropithecus_gelada	Geladas_V	16.48611111	F	11.39	NA	0	0	0.485294118	0.422743056	0	0	0	0
Theropithecus_gelada	Geladas_V	16.48611111	F	8.69	NA	0	0	0.288888889	0.472222222	0	0	NA	NA
Theropithecus_gelada	Geladas_V	16.48611111	F	12	NA	0	NA	0.37312974	NA	0.142857143	0	NA	NA
Theropithecus_gelada	Geladas_V	16.48611111	F	10.51	NA	NA	0	0.425925926	0.409150327	NA	NA	0	0
Theropithecus_gelada	Geladas_V	16.48611111	F	10.69	NA	0	NA	0.485087719	0.471428571	NA	NA	NA	NA
Theropithecus_gelada	Geladas_V	16.48611111	F	10.18	NA	NA	NA	0.478835979	0.433333333	NA	NA	NA	NA
Theropithecus_gelada	Geladas_V	16.48611111	F	9.63	NA	NA	0	NA	0.406234595	NA	NA	0	0
Theropithecus_gelada	Geladas_V	16.48611111	M	14.04	NA	NA	0	0.5	0.431605976	NA	NA	NA	NA
Theropithecus_gelada	Geladas_Z	19.43611111	F	5.89	0.275	NA	NA	NA	NA	NA	NA	NA	NA
Theropithecus_gelada	Geladas_Z	19.43611111	F	3.6	0.3488	NA	NA	NA	NA	NA	NA	NA	NA
Theropithecus_gelada	Geladas_Z	19.43611111	F	4	0.2368	NA	NA	NA	NA	NA	NA	NA	NA
Theropithecus_gelada	Geladas_Z	19.43611111	F	3.64	0.2826	NA	NA	NA	NA	NA	NA	NA	NA
Theropithecus_gelada	Geladas_Z	19.43611111	F	6.32	0.2308	NA	NA	NA	NA	NA	NA	NA	NA
Theropithecus_gelada	Geladas_Z	19.43611111	F	4.44	0.4167	NA	NA	NA	NA	NA	NA	NA	NA
Theropithecus_gelada	Geladas_Z	19.43611111	F	6.11	0.28	NA	NA	NA	NA	NA	NA	NA	NA
Theropithecus_gelada	Geladas_Z	19.43611111	M	8.87	0.2979	NA	NA	NA	NA	NA	NA	NA	NA
Theropithecus_gelada	Geladas_Z3	9	F	4	NA	NA	NA	NA	NA	NA	NA	NA	NA
Theropithecus_gelada	Geladas_Z3	9	F	4.8	NA	NA	NA	NA	NA	NA	NA	NA	NA
Theropithecus_gelada	Geladas_Z3	9	F	4.44	NA	NA	NA	NA	NA	NA	NA	NA	NA
Theropithecus_gelada	Geladas_Z3	9	F	11.53	NA	NA	NA	NA	NA	NA	NA	NA	NA
Theropithecus_gelada	Geladas_Z3	9	M	9.71	NA	NA	NA	NA	NA	NA	NA	NA	NA
Theropithecus_gelada	Geladas_Z5	14.84722222	F	4.4	NA	NA	NA	NA	NA	NA	NA	NA	NA
Theropithecus_gelada	Geladas_Z5	14.84722222	F	4.36	NA	NA	NA	NA	NA	NA	NA	NA	NA
Theropithecus_gelada	Geladas_Z5	14.84722222	F	3.27	NA	NA	NA	NA	NA	NA	NA	NA	NA
Theropithecus_gelada	Geladas_Z5	14.84722222	M	8.4	NA	NA	NA	NA	NA	NA	NA	NA	NA
Theropithecus_gelada	Geladas_Z5	14.84722222	M	8	NA	NA	NA	NA	NA	NA	NA	NA	NA
Indri_indri	Indri_Lemurs_1MZ_2018	3	F	0.16	0.275	NA	NA	NA	NA	NA	NA	NA	NA
Indri_indri	Indri_Lemurs_1MZ_2018	3	M	0.18	0.1525	NA	NA	NA	NA	NA	NA	NA	NA
Indri_indri	Indri_Lemurs_2MZ_2018	3	F	0.35	0.14	NA	NA	NA	NA	NA	NA	NA	NA
Indri_indri	Indri_Lemurs_2MZ_2018	3	M	0.67	0.2632	NA	NA	NA	NA	NA	NA	NA	NA
Indri_indri	Indri_Lemurs_3MZ_2018	4	F	0.21	0.24	NA	0.07	NA	0.477272727	NA	NA	0.5	0.5
Indri_indri	Indri_Lemurs_3MZ_2018	4	F	0.2	0.2444	0	NA	0.477272727	NA	1	0	NA	NA
Indri_indri	Indri_Lemurs_3MZ_2018	4	M	0.28	0	NA	NA	NA	NA	NA	NA	NA	NA
Indri_indri	Indri_Lemurs_3MZ_2018	4	M	0.41	0.0357	0.07	0	0.5	0.5	NA	NA	NA	NA
Indri_indri	Indri_Lemurs_4MZ_2018	5	NA	0	0.1875	NA	NA	NA	0.470588235	NA	NA	NA	NA
Indri_indri	Indri_Lemurs_4MZ_2018	5	F	0.16	0.2653	NA	NA	0.492647059	NA	1	0	NA	NA
Indri_indri	Indri_Lemurs_4MZ_2018	5	M	0.151898734	0.1852	NA	NA	0.5	0.5	NA	NA	NA	NA
Indri_indri	Indri_Lemurs_4MZ_2018	5	M	0.16	NA	NA	NA	NA	0.476190476	NA	NA	NA	NA
Indri_indri	Indri_Lemurs_4MZ_2018	5	M	0	0.0556	NA	NA	0.428571429	0.5	NA	NA	NA	NA
Indri_indri	Indri_Lemurs_5MZ_2018	3	F	0.17	0.1875	0	NA	NA	NA	0.5	0	NA	NA
Indri_indri	Indri_Lemurs_5MZ_2018	3	M	0.13	0.15	0.17	0	0.432432432	NA	0.7	0.1	0.5	0
Indri_indri	Indri_Lemurs_5MZ_2018	3	M	0.27	0	NA	0.17	NA	0.432432432	NA	NA	0.7	0.1
Indri_indri	Indri_Lemurs_6MZ_2018	4	F	0.3	NA	NA	NA	NA	NA	NA	NA	NA	NA
Indri_indri	Indri_Lemurs_6MZ_2018	4	M	0	0.2571	NA	NA	NA	NA	NA	NA	NA	NA
Indri_indri	Indri_Lemurs_6MZ_2018	4	M	0.35	NA	NA	NA	NA	NA	NA	NA	NA	NA
Indri_indri	Indri_Lemurs_9MZ_2018	4	F	0.59	0.1538	NA	NA	NA	NA	NA	NA	NA	NA
Indri_indri	Indri_Lemurs_9MZ_2018	4	M	0.98	0.1111	NA	NA	NA	NA	NA	NA	NA	NA
Indri_indri	Indri_Lemurs_9MZ_2018	4	M	1.58	0.2	NA	NA	NA	NA	NA	NA	NA	NA
Macaca_fuscata	Japanese_Macaques_Barbora	38	F	8.77	NA	0	NA	0.429487179	NA	0.125	0	NA	NA
Macaca_fuscata	Japanese_Macaques_Barbora	38	F	11.82	NA	NA	0	NA	NA	NA	NA	0	0
Macaca_fuscata	Japanese_Macaques_Barbora	38	F	4.32	NA	NA	NA	0.5	NA	0	0	NA	NA
Macaca_fuscata	Japanese_Macaques_Barbora	38	F	14.08	NA	NA	0	NA	0	NA	NA	0	0
Macaca_fuscata	Japanese_Macaques_Barbora	38	F	8.5	NA	NA	NA	0.466386555	NA	NA	NA	NA	NA
Macaca_fuscata	Japanese_Macaques_Barbora	38	F	13.08	NA	NA	NA	NA	0.5	NA	NA	NA	NA
Macaca_fuscata	Japanese_Macaques_Barbora	38	F	3.37	NA	0	NA	0.5	0.384615385	0	0	0	0
Macaca_fuscata	Japanese_Macaques_Barbora	38	F	19.45	NA	NA	0	NA	0.462962963	NA	NA	0	0
Macaca_fuscata	Japanese_Macaques_Barbora	38	F	16.53	NA	0	NA	0.333333333	0.378968254	0	0	NA	NA
Macaca_fuscata	Japanese_Macaques_Barbora	38	F	4.09	NA	0	NA	0.4375	0.470588235	0	0	NA	NA
Macaca_fuscata	Japanese_Macaques_Barbora	38	F	11.48	NA	NA	NA	0.388888889	0.444444444	NA	NA	0	0
Macaca_fuscata	Japanese_Macaques_Barbora	38	F	5.38	NA	0	NA	0.333333333	0.5	0	0	NA	NA
Macaca_fuscata	Japanese_Macaques_Barbora	38	F	8.62	NA	NA	NA	NA	NA	NA	NA	NA	NA
Papio_cynocephalus_kindae	Kinda_Baboons	67	F	2.24	NA	NA	NA	NA	NA	NA	NA	NA	NA
Papio_cynocephalus_kindae	Kinda_Baboons	67	F	1.99	NA	NA	NA	NA	NA	NA	NA	NA	NA
Papio_cynocephalus_kindae	Kinda_Baboons	67	F	2.47	NA	NA	0	NA	NA	NA	NA	0.076923077	0
Papio_cynocephalus_kindae	Kinda_Baboons	67	F	2.21	NA	NA	0	NA	NA	NA	NA	0.153846154	0
Papio_cynocephalus_kindae	Kinda_Baboons	67	F	2.21	NA	NA	NA	NA	NA	NA	NA	NA	NA
Papio_cynocephalus_kindae	Kinda_Baboons	67	F	3.43	NA	NA	0	NA	NA	NA	NA	0	0
Papio_cynocephalus_kindae	Kinda_Baboons	67	F	1.25	NA	NA	0	NA	NA	NA	NA	0.1	0
Papio_cynocephalus_kindae	Kinda_Baboons	67	F	1.48	NA	0	0	NA	NA	0.1	0	0.2	0
Papio_cynocephalus_kindae	Kinda_Baboons	67	F	3.51	NA	0	0	NA	NA	0	0	0.125	0.125
Papio_cynocephalus_kindae	Kinda_Baboons	67	F	3.86	NA	0	0	NA	NA	0.25	0	0.2	0
Papio_cynocephalus_kindae	Kinda_Baboons	67	F	1.88	NA	NA	NA	NA	NA	NA	NA	NA	NA
Papio_cynocephalus_kindae	Kinda_Baboons	67	F	1.29	NA	NA	NA	NA	NA	NA	NA	NA	NA
Gorilla_beringei	Mountain_gorillas	13	F	7.14	NA	0	0	0.021276596	0	0	0	1	0
Gorilla_beringei	Mountain_gorillas	13	F	9.72	NA	NA	0	0	0	NA	NA	0.888888889	0
Gorilla_beringei	Mountain_gorillas	13	F	11.97	NA	0.5	0	0.111111111	0.225	0.5	0.5	1	0
Gorilla_beringei	Mountain_gorillas	13	F	7.77	NA	NA	0	0.173333333	0.36	0.666666667	0	1	0
Gorilla_beringei	Mountain_gorillas	13	F	2.86	NA	NA	NA	NA	NA	NA	NA	NA	NA
Gorilla_beringei	Mountain_gorillas	13	M	11.8	NA	0.33	NA	0	0.021276596	0.75	0	NA	NA
Gorilla_beringei	Mountain_gorillas	13	M	10.18	NA	NA	0	NA	NA	1	0	0.666666667	0
Gorilla_beringei	Mountain_gorillas	13	M	8.43	NA	0	0.17	NA	0.166666667	1	0	0	0
Gorilla_beringei	Mountain_gorillas	13	M	12.67	NA	0	NA	0.090714286	NA	1	0	NA	NA
Papio_anubis	Olive_Baboons_ENK	17	F	4.34	NA	0.19	0.04	0.140740741	0.28367472	NA	NA	0.352941176	0
Papio_anubis	Olive_Baboons_ENK	17	F	5.41	NA	0.07	0.13	0.05952381	0	NA	NA	NA	NA
Papio_anubis	Olive_Baboons_ENK	17	F	4.45	NA	0.25	0.15	0.279761905	0.272820071	NA	NA	0.25	0
Papio_anubis	Olive_Baboons_ENK	17	F	4.19	NA	0.12	0.02	0.220574163	0.350164541	NA	NA	NA	NA
Papio_anubis	Olive_Baboons_ENK	17	F	8.45	NA	0.1	NA	0.176677868	0.416666667	0.25	0	NA	NA
Papio_anubis	Olive_Baboons_ENK	17	F	7.97	NA	0	0.06	0.2	0.097619048	NA	NA	0.333333333	0
Papio_anubis	Olive_Baboons_ENK	17	F	6.71	NA	NA	0.15	NA	0.220431235	NA	NA	0	0
Papio_anubis	Olive_Baboons_ENK	17	F	6.17	NA	0.17	0	0.226923077	0.338972431	0	0	0.25	0
Papio_anubis	Olive_Baboons_ENK	17	M	5	NA	0.1	0.25	0.388814617	0	0.318181818	0	0	0
Papio_anubis	Olive_Baboons_ENK	17	M	3.86	NA	0	NA	0.28525641	0.4	NA	NA	NA	NA
Papio_anubis	Olive_Baboons_ENK	17	M	1.29	NA	0.13	0.42	0	NA	NA	NA	NA	NA
Papio_anubis	Olive_Baboons_ENK	17	M	7.33	NA	NA	NA	NA	NA	NA	NA	NA	NA
Papio_anubis	Olive_Baboons_ENK	17	M	7.13	NA	0.18	NA	0.315919394	NA	0	0	NA	NA
Papio_anubis	Olive_Baboons_PHG	40	F	10.79	NA	0.04	0.1	0.264472649	0.332763533	0.148148148	0	0.333333333	0
Papio_anubis	Olive_Baboons_PHG	40	F	6.5	NA	0	0.18	0.1875	0.278425278	NA	NA	0.125	0
Papio_anubis	Olive_Baboons_PHG	40	F	9.75	NA	0.3	0.01	0.250653595	0.242063492	0.25	0	0.104166667	0
Papio_anubis	Olive_Baboons_PHG	40	F	5.13	NA	0.06	0.03	0.18	0.385087719	0	0	0.0625	0
Papio_anubis	Olive_Baboons_PHG	40	F	9	NA	NA	NA	NA	NA	NA	NA	NA	NA
Papio_anubis	Olive_Baboons_PHG	40	F	6.07	NA	NA	NA	NA	NA	NA	NA	NA	NA
Papio_anubis	Olive_Baboons_PHG	40	F	4.97	NA	0.28	0.07	0.153388278	0.206577682	0.285714286	0	0.133333333	0
Papio_anubis	Olive_Baboons_PHG	40	F	6.87	NA	0	0.04	0.1	0.359863946	0.142857143	0	0.181818182	0
Papio_anubis	Olive_Baboons_PHG	40	F	6.62	NA	0.19	0	0.208333333	0.203125	0.4	0	0.3	0
Papio_anubis	Olive_Baboons_PHG	40	F	3.61	NA	0.33	0.11	0.5	0.259821429	NA	NA	0.142857143	0
Papio_anubis	Olive_Baboons_PHG	40	F	6.46	NA	0.17	0.13	0.260966811	0.284722222	NA	NA	0.111111111	0
Papio_anubis	Olive_Baboons_PHG	40	F	6.5	NA	0.25	0.13	0	0.211856662	NA	NA	0.416666667	0
Papio_anubis	Olive_Baboons_PHG	40	F	7.67	NA	0.11	0.02	0.27826087	0.299369748	0	0	0.571428571	0
Papio_anubis	Olive_Baboons_PHG	40	F	10.38	NA	NA	0.08	NA	0.15962704	NA	NA	0.166666667	0
Papio_anubis	Olive_Baboons_PHG	40	F	6.01	NA	0.33	0.01	0.416666667	0.263414814	NA	NA	0.25	0
Papio_anubis	Olive_Baboons_PHG	40	F	7.23	NA	0.08	0.15	0.303174603	0.132352941	NA	NA	0.333333333	0
Papio_anubis	Olive_Baboons_PHG	40	F	4.75	NA	0	0.13	0.333333333	0.256462585	NA	NA	0.166666667	0
Papio_anubis	Olive_Baboons_PHG	40	F	4.31	NA	0	0.18	0.111111111	0.212820513	NA	NA	0	0
Papio_anubis	Olive_Baboons_PHG	40	F	2.72	NA	0.17	0	0.5	0.2	0.333333333	0	0.5	0
Papio_anubis	Olive_Baboons_PHG	40	M	4.36	NA	0	0	0.324444444	NA	0.12	0	NA	NA
Papio_anubis	Olive_Baboons_PHG	40	M	5.67	NA	NA	NA	NA	NA	NA	NA	NA	NA
Papio_anubis	Olive_Baboons_PHG	40	M	4.81	NA	0.04	0	0.236243386	NA	0.225	0	0	0
Papio_anubis	Olive_Baboons_PHG	40	M	4.44	NA	0	0	0.5	NA	0.142857143	0	0	0
Papio_anubis	Olive_Baboons_PHG	40	M	7.3	NA	0.09	0	0.31807099	NA	0.310344828	0	0	0
Papio_anubis	Olive_Baboons_PHG	40	M	4.3	NA	0.04	0.5	0.259722222	NA	0.2	0	0	0
Papio_anubis	Olive_Baboons_PHG	40	M	4.05	NA	0.14	NA	0.270588235	NA	0.042553191	0	NA	NA
Papio_anubis	Olive_Baboons_PHG	40	M	3.49	NA	0	0.09	0.274508825	0.5	0.571428571	0	0	0
Papio_anubis	Olive_Baboons_PHG	40	M	5.15	NA	0	NA	0.114835165	NA	0	0	NA	NA
Papio_anubis	Olive_Baboons_PHG	40	M	2.56	NA	0	0	0	0.5	NA	NA	NA	NA
Papio_anubis	Olive_Baboons_PHG	40	M	8.56	NA	NA	0.25	0.383184524	0	0.222222222	0	NA	NA
Papio_anubis	Olive_Baboons_PHG	40	M	10.78	NA	0	0.28	0.0625	0.153846154	0	0	NA	NA
Papio_anubis	Olive_Baboons_PHG	40	M	3.23	NA	0.13	NA	0	NA	0.333333333	0	NA	NA
Cercocebus_torquatus_atys	Sooty_Mangabeys	65	F	0.83	0.0667	0	NA	0	0.5	0.142857143	NA	0	NA
Cercocebus_torquatus_atys	Sooty_Mangabeys	65	F	2.17	0	NA	NA	NA	NA	0	NA	0	NA
Cercocebus_torquatus_atys	Sooty_Mangabeys	65	F	1.25	NA	NA	NA	0.5	0	NA	NA	0	NA
Cercocebus_torquatus_atys	Sooty_Mangabeys	65	F	0	0.1818	0	0	NA	0.416666667	0	NA	0	NA
Cercocebus_torquatus_atys	Sooty_Mangabeys	65	F	3.83	0.0769	0	0	0.388888889	NA	0	NA	0	NA
Cercocebus_torquatus_atys	Sooty_Mangabeys	65	F	0	0	0	0	NA	NA	0	NA	0	NA
Cercocebus_torquatus_atys	Sooty_Mangabeys	65	F	0	0.1053	0.13	0	NA	NA	0	NA	0.1	NA
Cercocebus_torquatus_atys	Sooty_Mangabeys	65	F	1.2	0.0714	0	NA	NA	NA	0	NA	NA	NA
Cercocebus_torquatus_atys	Sooty_Mangabeys	65	F	0.73	0.12	0	0	0.5	NA	0	NA	0	NA
Cercocebus_torquatus_atys	Sooty_Mangabeys	65	F	1.67	0.0833	0	NA	NA	NA	NA	NA	NA	NA
Cercocebus_torquatus_atys	Sooty_Mangabeys	65	F	1.4	NA	NA	0.25	NA	0.3	NA	NA	0	NA
Cercocebus_torquatus_atys	Sooty_Mangabeys	65	F	1.17	0.0833	0.5	0	NA	NA	0	NA	0	NA
Cercocebus_torquatus_atys	Sooty_Mangabeys	65	F	2	0.0909	0.5	NA	0.5	NA	0	NA	NA	NA
Cercocebus_torquatus_atys	Sooty_Mangabeys	65	F	2	0.2	NA	NA	0.5	0.5	0	NA	0	NA
Cercocebus_torquatus_atys	Sooty_Mangabeys	65	F	0	0	NA	0.13	NA	0.166666667	0	NA	0	NA
Cercocebus_torquatus_atys	Sooty_Mangabeys	65	F	0.13	0.1154	0	0.17	0.333333333	NA	NA	NA	0.181818182	NA
Cercocebus_torquatus_atys	Sooty_Mangabeys	65	F	0	NA	NA	0	NA	0.416666667	0	NA	0.083333333	NA
Cercocebus_torquatus_atys	Sooty_Mangabeys	65	F	0	0.0714	NA	0	NA	NA	0	NA	0	NA
Cercocebus_torquatus_atys	Sooty_Mangabeys	65	F	1.64	0.0435	NA	0	NA	NA	0	NA	0.076923077	NA
Cercocebus_torquatus_atys	Sooty_Mangabeys	65	F	3.17	0	NA	NA	NA	NA	NA	NA	NA	NA
Cercocebus_torquatus_atys	Sooty_Mangabeys	65	F	2	0.3	0	NA	NA	NA	0.111111111	NA	NA	NA
Cercocebus_torquatus_atys	Sooty_Mangabeys	65	F	0.55	0.375	NA	0	NA	0.5	NA	NA	0.055555556	NA
Cercocebus_torquatus_atys	Sooty_Mangabeys	65	F	1.43	0	0	NA	0.5	NA	0.142857143	NA	NA	NA
Cercocebus_torquatus_atys	Sooty_Mangabeys	65	F	1.83	0.0714	0	NA	0.5	NA	0	NA	NA	NA
Cercocebus_torquatus_atys	Sooty_Mangabeys	65	F	0	0.05	NA	0	NA	NA	NA	NA	0	NA
Cercocebus_torquatus_atys	Sooty_Mangabeys	65	M	0.2	NA	NA	NA	NA	NA	NA	NA	NA	NA
Cercocebus_torquatus_atys	Sooty_Mangabeys	65	M	0.67	0.1	0	NA	NA	NA	0	NA	NA	NA
Cercocebus_torquatus_atys	Sooty_Mangabeys	65	M	0	0	0	NA	0.2	NA	0	NA	NA	NA
Cercocebus_torquatus_atys	Sooty_Mangabeys	65	M	0.17	NA	0	NA	NA	NA	0	NA	NA	NA
Ateles_geoffroyi	Spider_Monkeys_Alban	20	F	19.69	NA	NA	NA	0.5	0.5	1	0.5	NA	NA
Ateles_geoffroyi	Spider_Monkeys_Alban	20	F	12.7	NA	0.5	NA	NA	NA	1	0	NA	NA
Ateles_geoffroyi	Spider_Monkeys_Alban	20	F	8.8	NA	0.5	NA	0.5	0.333333333	1	0	NA	NA
Ateles_geoffroyi	Spider_Monkeys_Alban	20	F	6.67	NA	NA	0.42	NA	0.344444444	1	0	1	0
Ateles_geoffroyi	Spider_Monkeys_Alban	20	F	20.22	NA	0.33	NA	0.388888889	NA	1	0	NA	NA
Ateles_geoffroyi	Spider_Monkeys_Alban	20	M	7.89	NA	NA	0.42	NA	0.166666667	NA	NA	1	0.166666667
Ateles_geoffroyi	Spider_Monkeys_Alban	20	M	7.75	NA	NA	NA	0.166666667	0.45	1	0.333333333	1	0.5
Ateles_geoffroyi	Spider_Monkeys_Alban	20	M	6.27	NA	0.33	0.33	0.5	0.4	1	0.25	1	0
Ateles_geoffroyi	Spider_Monkeys_Alban	20	M	20.11	NA	NA	NA	0.366666667	NA	1	0	NA	NA
Ateles_geoffroyi	Spider_Monkeys_Hugh	18	F	8.76	NA	NA	NA	NA	0	NA	NA	NA	NA
Ateles_geoffroyi	Spider_Monkeys_Hugh	18	F	7.76	NA	NA	NA	0.25	0	NA	NA	NA	NA
Ateles_geoffroyi	Spider_Monkeys_Hugh	18	F	5.71	NA	NA	NA	NA	NA	NA	NA	NA	NA
Ateles_geoffroyi	Spider_Monkeys_Hugh	18	F	6.17	NA	NA	NA	NA	NA	NA	NA	NA	NA
Ateles_geoffroyi	Spider_Monkeys_Hugh	18	F	3.84	NA	0	NA	0.133333333	NA	NA	NA	NA	NA
Ateles_geoffroyi	Spider_Monkeys_Hugh	18	F	4.54	NA	NA	NA	0	NA	NA	NA	NA	NA
Ateles_geoffroyi	Spider_Monkeys_Hugh	18	F	4.42	NA	NA	0	NA	NA	NA	NA	NA	NA
Ateles_geoffroyi	Spider_Monkeys_Hugh	18	M	1.45	NA	NA	NA	NA	NA	NA	NA	NA	NA
Ateles_geoffroyi	Spider_Monkeys_Hugh	18	M	1.83	NA	NA	NA	NA	0.083333333	NA	NA	NA	NA
Ateles_geoffroyi	Spider_Monkeys_Hugh	18	M	1.03	NA	NA	NA	0	0	NA	NA	NA	NA
Ateles_geoffroyi	Spider_Monkeys_Hugh	18	M	1.08	NA	NA	NA	NA	NA	NA	NA	NA	NA
Propithecus_verreauxi	Verreauxs_Sifaka__C_	5	F	7.2	NA	0.09	NA	0	NA	0.6	0	NA	NA
Propithecus_verreauxi	Verreauxs_Sifaka__C_	5	M	1.58	NA	0	0.27	0.214285714	0	0.416666667	0	0.571428571	0
Propithecus_verreauxi	Verreauxs_Sifaka__E_	7	F	9.08	NA	0.11	NA	0	NA	0.5	0	NA	NA
Propithecus_verreauxi	Verreauxs_Sifaka__E_	7	M	7.64	NA	0.17	0.33	0.274358974	0	0.666666667	0	0.5	0
Propithecus_verreauxi	Verreauxs_Sifaka__F_	6	F	8.96	NA	0.09	NA	0.228571429	NA	0.825	0	NA	NA
Propithecus_verreauxi	Verreauxs_Sifaka__F_	6	M	4.29	NA	0.14	0.33	0.052631579	0.259259259	0.5	0	0.777777778	0
Propithecus_verreauxi	Verreauxs_Sifaka__F1_	5	F	18.31	NA	0.07	NA	0.166666667	NA	0.583333333	0	NA	NA
Propithecus_verreauxi	Verreauxs_Sifaka__F1_	5	M	3.33	NA	0.29	0.14	0.220238095	0.166666667	0.5	0	0.5	0
Propithecus_verreauxi	Verreauxs_Sifaka__G_	7	F	11.76	NA	0.16	NA	0.03125	NA	0.45	0	NA	NA
Propithecus_verreauxi	Verreauxs_Sifaka__G_	7	M	5.27	NA	0.08	0.29	0.382777778	0	0.4	0	0.75	0
Propithecus_verreauxi	Verreauxs_Sifaka__H_	3	F	4	NA	0.04	NA	0.125	NA	0.8	0	NA	NA
Propithecus_verreauxi	Verreauxs_Sifaka__H_	3	M	3.78	NA	0	0.08	0.457142857	0	1	0	0.7	0
Propithecus_verreauxi	Verreauxs_Sifaka__J_	7	F	0.67	NA	0	0	0.3	0.1	1	0	0.5	0
Propithecus_verreauxi	Verreauxs_Sifaka__J_	7	M	9.62	NA	NA	0.25	0	NA	NA	NA	1	0
Propithecus_verreauxi	Verreauxs_Sifaka__L_	4	F	20	NA	0.35	NA	0.038461538	NA	0.6	0	NA	NA
Propithecus_verreauxi	Verreauxs_Sifaka__L_	4	M	17.65	NA	NA	0.35	0.481481481	0	NA	NA	0.6	0
Propithecus_verreauxi	Verreauxs_Sifaka_EH	5	F	0.37	NA	NA	NA	NA	NA	NA	NA	NA	NA
Propithecus_verreauxi	Verreauxs_Sifaka_EH	5	M	0.47	NA	NA	NA	NA	NA	NA	NA	NA	NA
Propithecus_verreauxi	Verreauxs_Sifaka_EH	5	M	0.63	NA	NA	NA	NA	NA	NA	NA	NA	NA
Propithecus_verreauxi	Verreauxs_Sifaka_EH	5	M	0.75	NA	NA	NA	NA	NA	NA	NA	NA	NA
Propithecus_verreauxi	Verreauxs_Sifaka_EH	5	M	0.67	NA	NA	NA	NA	NA	NA	NA	NA	NA
Propithecus_verreauxi	Verreauxs_Sifaka_FN	9	F	0.46	NA	0	NA	0.398809524	NA	0.529411765	0	NA	NA
Propithecus_verreauxi	Verreauxs_Sifaka_FN	9	F	1.04	NA	0.05	0	0.366666667	0.428571429	0.545454545	0	0.285714286	0
Propithecus_verreauxi	Verreauxs_Sifaka_FN	9	M	0.39	NA	NA	0.1	NA	0.227380952	NA	NA	0.625	0
Propithecus_verreauxi	Verreauxs_Sifaka_FN	9	M	0.61	NA	0	0	0.328205128	NA	0.75	0	0.538461538	0
Propithecus_verreauxi	Verreauxs_Sifaka_FN	9	M	0	NA	NA	0	0.333333333	0.387820513	NA	NA	0.666666667	0
Propithecus_verreauxi	Verreauxs_Sifaka_FN	9	M	0.17	NA	0.14	0	0.369047619	0.416666667	0.5	NA	0.333333333	NA
Propithecus_verreauxi	Verreauxs_Sifaka_HT	4	F	0	NA	0.16	NA	0.125	NA	0.857142857	0	NA	NA
Propithecus_verreauxi	Verreauxs_Sifaka_HT	4	M	0	NA	NA	NA	NA	NA	NA	NA	NA	NA
Propithecus_verreauxi	Verreauxs_Sifaka_HT	4	M	0.1	NA	NA	0.17	NA	0.184210526	NA	NA	0.8	0
Propithecus_verreauxi	Verreauxs_Sifaka_HT	4	M	0	NA	NA	0.15	0.368421053	0.25	NA	NA	0.909090909	0
Propithecus_verreauxi	Verreauxs_Sifaka_MT	8	F	0	NA	0.08	NA	0.204433812	NA	0.870967742	0	NA	NA
Propithecus_verreauxi	Verreauxs_Sifaka_MT	8	F	0.17	NA	0	0.38	0.166666667	0.473684211	0.851851852	0	0.333333333	NA
Propithecus_verreauxi	Verreauxs_Sifaka_MT	8	F	0	NA	NA	0	0.4	0.232142857	NA	NA	0.909090909	0
Propithecus_verreauxi	Verreauxs_Sifaka_MT	8	M	0.69	NA	NA	0.11	NA	0.220808081	NA	NA	0.933333333	0
Propithecus_verreauxi	Verreauxs_Sifaka_MT	8	M	0.09	NA	NA	0	0.364285714	0.4	1	NA	0.923076923	0
Propithecus_verreauxi	Verreauxs_Sifaka_MT	8	M	0.17	NA	0.33	0	0.407407407	0.166666667	0.5	NA	0.772727273	0
Propithecus_verreauxi	Verreauxs_Sifaka_PP	5	F	0.31	NA	0	NA	0.305555556	NA	0.642857143	0	NA	NA
Propithecus_verreauxi	Verreauxs_Sifaka_PP	5	F	0.59	NA	NA	0	NA	0.309163059	NA	NA	0.6	0
Propithecus_verreauxi	Verreauxs_Sifaka_PP	5	M	0.7	NA	0	0	0.208333333	0.39869281	NA	NA	0.666666667	0
Propithecus_verreauxi	Verreauxs_Sifaka_PP	5	M	0.23	NA	NA	0.25	0.363636364	0.375	NA	NA	0.4	0
Propithecus_verreauxi	Verreauxs_Sifaka_PP	5	M	0.58	NA	0.25	0	0.385504202	0	0.333333333	NA	0.5	NA
Propithecus_verreauxi	Verreauxs_Sifaka_SH	11	F	0.49	NA	0	NA	0.152058824	NA	0.894736842	0	NA	NA
Propithecus_verreauxi	Verreauxs_Sifaka_SH	11	F	0	NA	NA	NA	NA	NA	NA	NA	NA	NA
Propithecus_verreauxi	Verreauxs_Sifaka_SH	11	F	0.93	NA	0.04	0	0.282539683	0.235294118	0.942857143	0	0.75	0
Propithecus_verreauxi	Verreauxs_Sifaka_SH	11	M	0	NA	NA	NA	NA	NA	NA	NA	NA	NA
Propithecus_verreauxi	Verreauxs_Sifaka_SH	11	M	1.8	NA	0.13	0	0.333333333	0.344444444	NA	NA	0.833333333	NA
Propithecus_verreauxi	Verreauxs_Sifaka_SH	11	M	3.7	NA	NA	0	0.4	0.266666667	NA	NA	1	0
Propithecus_verreauxi	Verreauxs_Sifaka_SH	11	M	0.53	NA	0	0	0.35	0.168154762	0.333333333	0	0.863636364	0
Propithecus_verreauxi	Verreauxs_Sifaka_SH	11	M	0.38	NA	NA	0.08	NA	0.346666667	NA	NA	0.833333333	0
Propithecus_verreauxi	Verreauxs_Sifaka_SH	11	M	0	NA	0	0	0.277777778	0	0.888888889	0	1	NA
Chlorocebus_pygerythrus	Vervet_Monkeys	67	F	1.33	0.1111	NA	NA	NA	NA	NA	NA	NA	NA
Chlorocebus_pygerythrus	Vervet_Monkeys	67	F	3.38	0.2857	NA	NA	NA	NA	NA	NA	NA	NA
Chlorocebus_pygerythrus	Vervet_Monkeys	67	F	1.08	0.0645	NA	NA	NA	NA	NA	NA	NA	NA
Chlorocebus_pygerythrus	Vervet_Monkeys	67	F	4.27	0.1667	NA	NA	0.277777778	0.444444444	0.25	0	NA	NA
Chlorocebus_pygerythrus	Vervet_Monkeys	67	F	0.7	0.1944	NA	NA	0.5	0.166666667	NA	NA	0.666666667	0
Chlorocebus_pygerythrus	Vervet_Monkeys	67	M	0.39	0.1282	NA	NA	NA	0	NA	NA	NA	NA
Chlorocebus_pygerythrus	Vervet_Monkeys	67	M	1.22	0.125	0	NA	0.166666667	NA	0	0	NA	NA
Chlorocebus_pygerythrus	Vervet_Monkeys	67	M	1.93	0.1579	NA	NA	NA	NA	NA	NA	NA	NA
Chlorocebus_pygerythrus	Vervet_Monkeys	67	M	2.81	0.1143	NA	NA	NA	NA	NA	NA	NA	NA
Chlorocebus_pygerythrus	Vervet_Monkeys	67	M	0.65	0	NA	NA	NA	NA	NA	NA	NA	NA
Chlorocebus_pygerythrus	Vervet_Monkeys	67	M	2.25	0	NA	NA	NA	NA	NA	NA	NA	NA
Chlorocebus_pygerythrus	Vervet_Monkeys	67	M	1.24	0.1707	NA	NA	NA	NA	NA	NA	NA	NA
Chlorocebus_pygerythrus	Vervet_Monkeys	67	M	1.09	0.0513	NA	0.25	NA	NA	NA	NA	0	0
Gorilla_gorilla_gorilla	Western_Gorillas	6	F	3.71	NA	NA	0	NA	NA	NA	NA	0.027777778	0.138888889
Gorilla_gorilla_gorilla	Western_Gorillas	6	F	13.04	NA	0.14	0.04	NA	NA	0	0.15625	0.041666667	0.083333333
Gorilla_gorilla_gorilla	Western_Gorillas	6	F	6.65	NA	0	0.13	NA	NA	0	0.166666667	0.04	0.12
Gorilla_gorilla_gorilla	Western_Gorillas	6	F	3.1	NA	0	0.1	NA	NA	0	0.6	0.029411765	0.264705882
Gorilla_gorilla_gorilla	Western_Gorillas	6	M	18.02	NA	0.02	NA	NA	NA	0.044444444	0.122222222	NA	NA
Cercopithecus_ascanius	Red_Tailed_Monkeys_R2	12	M	1.36	0.44	NA	NA	0.212121212	0.5	NA	NA	NA	NA
Cercopithecus_ascanius	Red_Tailed_Monkeys_R2	12	F	19.36	0.28	0	0	0.285714286	0.294444444	NA	NA	NA	NA
Cercopithecus_ascanius	Red_Tailed_Monkeys_R2	12	F	22.36	0.47	0	NA	0.328269231	0.442857143	NA	NA	NA	NA
Cercopithecus_ascanius	Red_Tailed_Monkeys_R2	12	F	18.91	0.56	0	0.33	0.166666667	0.309124209	NA	NA	NA	NA
Cercopithecus_ascanius	Red_Tailed_Monkeys_R2	12	F	19.3	0.33	0.33	0.33	0.361904762	0.171875	NA	NA	NA	NA
Cercopithecus_ascanius	Red_Tailed_Monkeys_R2	12	F	18	0.24	NA	NA	0.38	NA	NA	NA	NA	NA
Cercopithecus_ascanius	Red_Tailed_Monkeys_R2	12	M	14.31	NA	NA	NA	0.333333333	0.5	NA	NA	NA	NA
Cercopithecus_ascanius	Red_Tailed_Monkeys_R5	22	F	13	0.66	NA	NA	0.178030303	0.142857143	NA	NA	NA	NA
Cercopithecus_ascanius	Red_Tailed_Monkeys_R5	22	F	16.29	0.63	0	NA	0	0.369090909	NA	NA	0	0
Cercopithecus_ascanius	Red_Tailed_Monkeys_R5	22	F	15	0.5	NA	NA	0.400705467	0.372222222	NA	NA	NA	NA
Cercopithecus_ascanius	Red_Tailed_Monkeys_R5	22	F	15.86	0.49	NA	NA	0.166666667	0.19047619	NA	NA	NA	NA
Cercopithecus_ascanius	Red_Tailed_Monkeys_R5	22	F	12.86	0.36	NA	NA	0.416666667	0.291666667	NA	NA	NA	NA
Cercopithecus_ascanius	Red_Tailed_Monkeys_R5	22	F	22.5	0.6	0	NA	0.208333333	NA	NA	NA	NA	NA
Cercopithecus_ascanius	Red_Tailed_Monkeys_R5	22	F	19.5	0.17	NA	NA	0.333333333	NA	NA	NA	NA	NA
Cercopithecus_ascanius	Red_Tailed_Monkeys_R5	22	F	8.25	0.5	NA	NA	NA	0.5	NA	NA	NA	NA
Cercopithecus_ascanius	Red_Tailed_Monkeys_R5	22	F	11.63	0.26	NA	NA	0.5	NA	NA	NA	NA	NA
